1 **Optimization of the Illumina COVIDSeq™ protocol for decentralized, cost-effective**  
2 **genomic surveillance**

3

4 Rob E. Carpenter, PhD<sup>1,2,5</sup>, Vaibhav K. Tamrakar, PhD<sup>3,4</sup>, Sadia Almas, PhD<sup>1</sup>, Chase Rowan,  
5 MS<sup>1</sup>, Rahul Sharma PhD<sup>1,4,5\*</sup>

6 <sup>1</sup>Advanta Genetics, 10935 CR 159, Tyler, Texas 75703, USA

7 <sup>2</sup>University of Texas at Tyler, 3900 University Boulevard, Tyler, Texas 75799, USA

8 <sup>3</sup>ICMR-National Institute of Research in Tribal Health, Jabalpur, MP 482003, INDIA

9 <sup>4</sup>RetroBioTech LLC, 838 Dalmalley Ln, Coppell, TX 75019, USA

10 <sup>5</sup>Scienetix, 10935 CR 159, Tyler, Texas 75703, USA

11

12

13 Corresponding author:

14 Rahul Sharma, PhD

15 Advanta Genetics, 10935 CR 159 Tyler, Texas 75703, USA

16 Phone: +1(225) 573-2690

17 Email: [rahuldnadx@gmail.com](mailto:rahuldnadx@gmail.com); [rsharma@aalabs.com](mailto:rsharma@aalabs.com)

18

19

20

21

22

23

24

25

26 **Abstract**

27

28 A decentralized surveillance system to identify local outbreaks and monitor SARS-CoV-2  
29 Variants of Concern is one of the primary strategies for the pandemic's containment. Although  
30 next-generation sequencing (NGS) is a gold standard for genomic surveillance and variant  
31 discovery, the technology is still cost-prohibitive for decentralized sequencing, particularly in  
32 small independent labs with limited resources. We have optimized the Illumina COVID-seq  
33 protocol to reduce cost without compromising accuracy. 90% of genomic coverage was achieved  
34 for 142/153 samples analyzed in this study. The lineage was correctly assigned to all samples  
35 (152/153) except for one. This modified protocol can help laboratories with constrained  
36 resources contribute to decentralized SARS-CoV-2 surveillance in the post-vaccination era.

37

38

39 **Keywords:** Illumina COVID-seq, SARS-CoV-2 variants, genomic surveillance, transmission  
40 dynamics, cost-effective approach

41           The severe acute respiratory syndrome coronavirus (SARS-CoV-2) pandemic has  
42 claimed millions of lives globally, highlighting the need for systemic de-centralized scientific  
43 capacities. Although currently, there is a downward progression of global COVID-19 cases  
44 (Murray et al., 2022), community-level surveillance by de-centralized genomic sequencing  
45 remains vital for monitoring the transmission dynamics of the pandemic and SARS-CoV-2  
46 mutagenic capacities. Keeping SARS-CoV-2 in the foreground, new lineages will likely emerge,  
47 and monitoring evolving variants is epidemiologically critical (Aleem et al., 2022; Anderson et  
48 al., 2021). While next-generation sequencing (NGS) has emerged as the gold standard  
49 technology for genomic surveillance and variant discovery (Berno et al., 2022), the technology  
50 remains cost prohibitive for de-centralized sequencing, particularly in small independent and  
51 resource-limited laboratories (Umunakwe et al., 2022). Illumina COVIDSeq<sup>TM</sup> is one of the  
52 most utilized methods for COVID surveillance, but the application has been limited mainly to  
53 centralized surveillance programs.

54           As part of a surveillance program sponsored by the Centers for Disease Control and  
55 Prevention (CDC), 95 clinical samples from Advanta Genetics were sent to Fulgent Genetics for  
56 sequencing. Our samples were sequenced at an average depth of 20,071.41x using Illumina  
57 COVIDSeq assay on NovaSeq 6000 instrument (Cost ~ 1 million USD), which requires pooling  
58 of 1000s of samples. The standard protocol doesn't require the normalization of libraries; thus,  
59 sequencing depth among 95 samples ranges from 286x to 287,4419x (Supplemental Table). This  
60 over-sequencing approach is acceptable in high throughput laboratories, where samples are  
61 sequenced at higher depths to achieve sufficient coverage for each sample. However, using low  
62 throughput instruments, the standard protocol is cost-prohibitive for de-centralized sequencing  
63 facilities.

64           Although Illumina has introduced a COVIDSeq™ 96 sample kit (Cat#20049393;  
65 cost/sample: \$40.00), the protocol directs preparing a 50µl library from each sample and pooling  
66 only 5µl for sequencing. The standard protocol doesn't recommend quantification and  
67 normalization of libraries before pooling, and 90% of the library volume is not used for pooling  
68 and sequencing.

69           Accordingly, this study describes the optimization of the Illumina COVIDSeq™  
70 Research Use Only (RUO) assay protocol for the decentralized implementation of SARS-CoV-2  
71 genomic surveillance. The protocol is modified to reduce cost and enhance efficiency on low  
72 throughput sequencing instruments like the Illumina MiniSeq® or MiSeq®. We optimized the  
73 protocol by using 50% reagent volume at each step during library preparation, resulting in a  
74 25µL library from each sample, cutting the library preparation cost by half (\$20/sample). Next,  
75 the individual library was quantified using a Qubit™ Flex Fluorometer (Invitrogen, Inc.), and  
76 representative libraries (N=12) prepared from the reference strains were also analyzed on a  
77 fragment analyzer. The average library size ( $347.66 \pm 22.82$  bp) and its concentration in (ng/µL)  
78 were used to calculate the molarity of the individual library. Individual libraries were also  
79 quantified using the KAPA Library Quantification Kits (Roche Cat # 07960140001). Individual  
80 libraries were diluted to achieve a normalized concentration of 10nM, and the normalized  
81 libraries were pooled in equimolar concentration instead of equal volume as recommended by  
82 the Illumina COVIDSeq™ kit. These additional normalization steps allowed us to achieve  
83 uniform coverage of all the libraries in the pool and efficiently use a low-throughput sequencing  
84 instrument. The final library pool was again quantified using a Qubit™ Flex Fluorometer  
85 (Invitrogen, Inc.) and a PCR-based library quantification kit (Scienetix, USA). The final library  
86 pool was denatured and diluted to a 2 pM loading concentration. Dual indexed paired-end

87 sequencing with 75bp read length was carried out using the high output flow cell (list price:  
88 \$1102.00) on the Illumina MiniSeq® instrument. This approach allowed us to reduce the cost of  
89 the COVIDSeq™ reagent (library preparation + sequencing) to \$56.00 per sample with a batch  
90 size of only ~30 samples. Pre-pooling normalization allowed us to achieve uniform coverage  
91 (median depth 595x) across the samples in the pool and higher efficiency. We could sequence  
92 ~30 clinical samples (diagnostic PCR Ct<30), positive control (Wuhan-Hu-1), and no template  
93 control (NTC) with each batch of libraries on a MiniSeq high-output flow cell.

94         The lowest sequencing depth of >200x and 90% genome coverage were found adequate  
95 for accurate variant detection while validating this assay for clinical testing according to the CAP  
96 (College of American Pathologists) guidelines for NGS-based Laboratory Developed Test (LDT)  
97 (Carpenter et al., 2022). Importantly, we sequenced 153 samples using this modified approach,  
98 and 152/153 (99.34%) samples (PCR Ct<30) resulted in the correct variant using DRAGEN  
99 COVID Lineage (v3.5.4), and 142/153 (92.81%) samples achieved 90% genome coverage with  
100 an average depth of >200x (Supplemental Table). Only 11/154 (7%) samples are below 200x  
101 coverage; out of 11 samples < 200x coverage (Table 1), the DRAGEN COVID Lineage analysis  
102 pipeline failed in assigning the lineage of only one sample with the lowest depth. We also re-  
103 sequenced six samples already sequenced by another reference laboratory (Fulgent Genetics,  
104 Inc.) at extremely high coverage (>30,000X) and compared the variant identities from this  
105 modified sequencing protocol. The results confirmed that all six samples were identified to carry  
106 identical variants by both laboratories, implicating 100% accuracy in the inter-laboratory testing  
107 of this modified approach. Interestingly, 3 of the six split samples were sequenced at >50,000x  
108 coverage by Fulgent Genetics, whereas we were able to sequence the same samples at only 200X  
109 coverage with identical variant detection. This illustrates higher sequencing efficiency with pre-

110 pooling quantification without compromising the test accuracy. Such higher efficiency is  
111 essential for the cost-effective application of this test in limited-resourced and de-centralized  
112 laboratory settings and for reference laboratories that do not have access to high throughput  
113 instruments such as Illumina NextSeq® or NovSeq® instruments. (Thomas et al., 2021)

114 This modified protocol can potentially empower small resource-limited laboratories to  
115 contribute to local genomic surveillance. We have adopted this modified protocol for sequencing  
116 153 genomes from East Texas, USA, and compared the results with PCR-based variant detection  
117 (Carpenter et al., 2022). High accuracy and reproducibility of this approach have been  
118 demonstrated in validating the COVIDSeq™ assay for clinical application according to Clinical  
119 Laboratory Improvement Amendments and College of American Pathologists guidelines. This  
120 cost-effective approach can be widely adopted for low-throughput sequencing and monitoring of  
121 emerging variants of SARS-CoV-2 and further support de-centralized genomic surveillance.

## 122 **Author Contributions**

123 Conceptualization RC and RS; Data curation SA, CR and RS; Formal analysis; RS and SA  
124 Validation RS and SA; Roles/Writing: original draft RS, SA, and VT; Writing: review & editing  
125 RC.

## 126 **Statement of Informed Consent**

127 No conflicts, informed consent, or human or animal rights apply to this work.

## 128 **Declaration of Competing Interest**

129 RS and RC declare that they have a financial interest in Scienetix, Inc. None of the other  
130 authors declare that they have no known competing financial interests or personal relationships  
131 that could have appeared to influence the work reported in this paper.

132

133

134 Table 1: Comparative sequencing using the modified COVIDSeq™ protocol  
135

| <b>Sequencing Parameter</b> | <b>Fulgent Genetics<br/>(n=95*)</b> | <b>Advanta Genetics<br/>(n=153*)</b> |
|-----------------------------|-------------------------------------|--------------------------------------|
| Mean Coverage               | 30257.05                            | 1132.30                              |
| Median Coverage             | 32148.50                            | 595.00                               |
| Standard Deviation (SD)     | 20071.41                            | 1232.19                              |
| Highest Coverage (X times)  | 2874419.50                          | 6913.00                              |
| Lowest Coverage (X times)   | 268.00                              | 56.00                                |
| Accurately Variant Calls    | 100% (95/95)                        | 99.34 (152/153)                      |

\* 6 samples were split and sequenced by both approaches.

136

137 **References**

- 138 Aleem, A., Samad, A. B. A., & Slenker, A. K. (2022). Emerging variants of SARS-CoV-2 and  
139 novel therapeutics against coronavirus (COVID-19). In *StatPearls [Internet]*. StatPearls  
140 Publishing. <https://www.ncbi.nlm.nih.gov/books/NBK570580/>
- 141 Anderson, R. M., Vegvari, C., Hollingsworth, T. D., Pi, L., Maddren, R., Ng, C. W., &  
142 Baggaley, R. F. (2021). The SARS-CoV-2 pandemic: remaining uncertainties in our  
143 understanding of the epidemiology and transmission dynamics of the virus, and  
144 challenges to be overcome. *Interface Focus*, *11*(6), 20210008.  
145 <https://doi.org/10.1098/rsfs.2021.0008>
- 146 Berno, G., Fabeni, L., Matusali, G., Gruber, C. E. M., Rueca, M., Giombini, E., & Garbuglia, A.  
147 R. (2022). SARS-CoV-2 Variants Identification: Overview of Molecular Existing  
148 Methods. *Pathogens*, *11*(9), 1058. <https://doi.org/10.3390/pathogens11091058>
- 149 Carpenter, R. E., Tamrakar, V., Chahar, H., Vine, T., & Sharma, R. (2022). Confirming  
150 multiplex q-PCR use in COVID-19 with next generation sequencing: Strategies for  
151 epidemiological advantage. *Global Health, Epidemiology and Genomics*, 1-10.  
152 <https://doi.org/10.1155/2022/2270965>
- 153 Carpenter, R. E., Tamrakar, V., Almas, S., Brown, E., & Sharma, R. (2022). COVID Seq as  
154 Laboratory Developed Test (LDT) for diagnosis of SARS-CoV-2 Variants of Concern  
155 (VOC). *Archives of Virology*, in review (ARVI-D-22-00875)
- 156 Murray, C. J. (2022). COVID-19 will continue, but the end of the pandemic is near. *The Lancet*,  
157 *399*(10323), 417-419. [https://doi.org/10.1016/S0140-6736\(22\)00100-3](https://doi.org/10.1016/S0140-6736(22)00100-3)



- 158 Thomas, E., Delabat, S., Carattini, Y. L., & Andrews, D. M. (2021). SARS-CoV-2 and variant  
159 diagnostic testing approaches in the United States. *Viruses*, *13*(12), 2492.  
160 <https://doi.org/10.3390/v13122492>
- 161 Umunnakwe, C. N., Makatini, Z. N., Maphanga, M., Mdunyelwa, A., Mlambo, K. M., Manyaka,  
162 P., & Tempelman, H. A. (2022). Evaluation of a commercial SARS-CoV-2 multiplex  
163 PCR genotyping assay for variant identification in resource-scarce settings. *Plos one*,  
164 *17*(6), e0269071. <https://doi.org/10.1371/journal.pone.0269071>
